# Supplementary material for: 現代美術国際交流展 : ワイマール・バウハウス大学/名古屋造形芸術大学 = Exchange exhibition of contemporary art : Bauhaus University (Weimar, Germany)/Nagoya Zokei University of Art & Design
Source: Springer Nature journal article supplement (doi:10.1186/1471-2105-13-83), 2005-01-01
Supplement: 12859_2011_5240_MOESM12_ESM.pdf [file 12859_2011_5240_MOESM12_ESM.pdf]

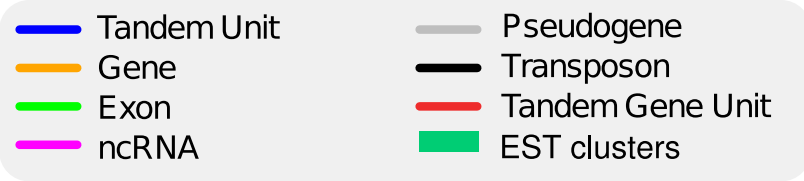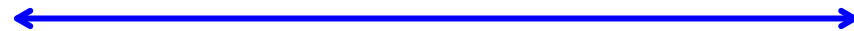

AT4G16220.1 >

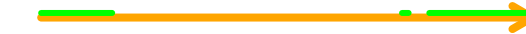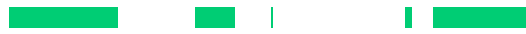

9182000

9184000

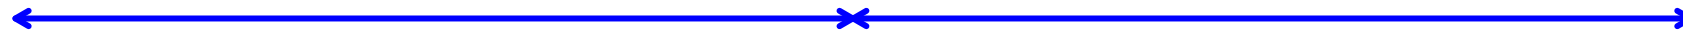

AT4G16230.1 >

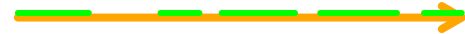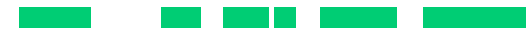

9188000

9190000
